# Supplementary material for: miR-146a, miR-221, and miR-155 are Involved in Inflammatory Immune Response in Severe COVID-19 Patients
Source: MDPI journal article supplement (doi:10.3390/diagnostics13010133), 2022-12-30
Supplement: s1 [file s1]

Supplementary Table 1. miRNAs selection criteria

| miRNAs   | Justification for validation                                                                                                                                                                                                                                                                        | Reference                             |
|----------|-----------------------------------------------------------------------------------------------------------------------------------------------------------------------------------------------------------------------------------------------------------------------------------------------------|---------------------------------------|
| miR-16   | Involved in regulation of inflammation and programmed cell death, acute lung injury, sepsis, phenotypic changes on T cells survival, differentiation, and proliferation.<br><br>Targeting genes responsible for host-SARS-CoV-2 interaction. Influence viral entry receptor (ACE2) related networks | [19,35,44,57,77–80]<br><br>[57,80,81] |
| miR-155  | Involved in inflammation. T cell differentiation and innate immunity.<br><br>Regulates pathways related with IFN superfamily, NF-kB and MAP Kinase pathways. Cardiac, lung and kidney damage.                                                                                                       | [11,43–45,82]<br><br>[23,83–85]       |
| miR-34a  | Thrombotic events and Ras signaling<br><br>Can bind to multiple sites on noncoding SARS-CoV-2 RNA, which can affect the host immune response                                                                                                                                                        | [19,86]<br><br>[87]                   |
| miR-146a | Regulation of cytokine-responsive gene expression, and the pro-inflammatory cytokines like IL-6, TNF- $\alpha$ , IL-1 and IL-8. Regulation of NF-kB, MAP kinase, and STAT 3 pathways. Thrombo-inflammatory processes. Cytokine storm.                                                               | [8,13,60,70–72,88,89]                 |
| miR-221  | Regulation of inflammation and vascular remodeling. Lung injury, coagulopathy, thrombosis.<br><br>Regulation of innate immune response and promoting viral infection.                                                                                                                               | [19,56,90]<br><br>[44,57–59]          |

## References

- [19] C. Eyileten, Z. Wicik, S.N. Simões, D.C. Martins-Jr, K. Klos, W. Wlodarczyk, A. Assinger, D. Soldacki, A. Chcialowski, J.M. Siller-Matula, M. Postula, Thrombosis-related circulating miR-16-5p is associated with disease severity in patients hospitalised for COVID-19, *RNA Biol.* 19 (2022) 963–979. <https://doi.org/10.1080/15476286.2022.2100629>.
- [77] M. Wang, J. Li, J. Cai, L. Cheng, X. Wang, P. Xu, G. Li, X. Liang, Overexpression of MicroRNA-16 Alleviates Atherosclerosis by Inhibition of Inflammatory Pathways, *Biomed Res. Int.* 2020 (2020). <https://doi.org/10.1155/2020/8504238>.
- [78] Y. Yang, F. Yang, X. Yu, B. Wang, Y. Yang, X. Zhou, R. Cheng, S. Xia, X. Zhou, miR-16 inhibits NLRP3 inflammasome activation by directly targeting TLR4 in acute lung injury, *Biomed. Pharmacother.* 112 (2019) 108664. <https://doi.org/10.1016/j.biopha.2019.108664>.

- [79] P. Möhnle, S. Hirschberger, L.C. Hinske, J. Briegel, M. Hübner, S. Weis, G. Dimopoulos, M. Bauer, E.J. Giamarellos-Bourboulis, S. Kreth, MicroRNAs 143 and 150 in whole blood enable detection of T-cell immunoparalysis in sepsis, *Mol. Med.* 24 (2018) 54. <https://doi.org/10.1186/s10020-018-0056-z>.
- [80] S. Jafarinejad-Farsangi, M.M. Jazi, F. Rostamzadeh, M. Hadizadeh, High affinity of host human microRNAs to SARS-CoV-2 genome: An in silico analysis, *Non-Coding RNA Res.* 5 (2020) 222–231. <https://doi.org/10.1016/j.ncrna.2020.11.005>.
- [57] W.R. Kim, E.G. Park, K.-W. Kang, S.-M. Lee, B. Kim, H.-S. Kim, Expression Analyses of MicroRNAs in Hamster Lung Tissues Infected by SARS-CoV-2, *Mol. Cells.* 43 (2020) 953–963. <https://doi.org/10.14348/molcells.2020.0177>.
- [44] M. Molinero, I.D. Benítez, J. González, C. Gort-Paniello, A. Moncusí-Moix, F. Rodríguez-Jara, M.C. García-Hidalgo, G. Torres, J.J. Vengoechea, S. Gómez, R. Cabo, J. Caballero, J.F. Bermejo-Martin, A. Ceccato, L. Fernández-Barat, R. Ferrer, D. Garcia-Gasulla, R. Menéndez, A. Motos, O. Peñuelas, J. Riera, A. Torres, F. Barbé, D. de Gonzalo-Calvo, Bronchial Aspirate-Based Profiling Identifies MicroRNA Signatures Associated With COVID-19 and Fatal Disease in Critically Ill Patients, *Front. Med.* 8 (2022) 1–15. <https://doi.org/10.3389/fmed.2021.756517>.
- [35] A. Herrera-Van Oostdam, J. Toro-Ortíz, J. López, D. Noyola, D. García-López, N. Durán-Figueroa, E. Martínez-Martínez, D. Portales-Pérez, M. Salgado-Bustamante, Y. López-Hernández, Placental exosomes isolated from urine of patients with gestational diabetes exhibit a differential profile expression of microRNAs across gestation, *Int. J. Mol. Med.* 46 (2020) 546–560. <https://doi.org/10.3892/ijmm.2020.4626>.
- [81] Z. Wicik, C. Eyileten, D. Jakubik, S.N. Simões, D.C. Martins, R. Pavão, J.M. Siller-Matula, M. Postula, ACE2 Interaction Networks in COVID-19: A Physiological Framework for Prediction of Outcome in Patients with Cardiovascular Risk Factors, *J. Clin. Med.* 9 (2020) 3743. <https://doi.org/10.3390/jcm9113743>.
- [45] E. Wyler, K. Mösbauer, V. Franke, A. Diag, L.T. Gottula, R. Arsiè, F. Klironomos, D. Koppstein, K. Hönzke, S. Ayoub, C. Buccitelli, K. Hoffmann, A. Richter, I. Legnini, A. Ivanov, T. Mari, S. Del Giudice, J. Papies, S. Praktiknjo, T.F. Meyer, M.A. Müller, D. Niemeyer, A. Hocke, M. Selbach, A. Akalin, N. Rajewsky, C. Drosten, M. Landthaler, Transcriptomic profiling of SARS-CoV-2 infected human cell lines identifies HSP90 as target for COVID-19 therapy, *IScience.* 24 (2021) 102151. <https://doi.org/10.1016/j.isci.2021.102151>.
- [11] B. Bautista-Becerril, G. Pérez-Dimas, P.C. Sommerhalder-Nava, A. Hanono, J.A. Martínez-Cisneros, B. Zarate-Maldonado, E. Muñoz-Soria, A. Aquino-Gálvez, M. Castillejos-López, A. Juárez-Cisneros, J.S. Lopez-Gonzalez, A. Camarena, miRNAs, from Evolutionary Junk to Possible Prognostic Markers and Therapeutic Targets in COVID-19, *Viruses.* 14 (2021) 41. <https://doi.org/10.3390/v14010041>.
- [43] R.A.-H. Haroun, W.H. Osman, R.E. Amin, A.K. Hassan, W.S. Abo-Shanab, A.M. Eessa, Circulating plasma miR-155 is a potential biomarker for the detection of SARS-CoV-2 infection, *Pathology.* 54 (2022) 104–110. <https://doi.org/10.1016/j.pathol.2021.09.006>.
- [82] J. Wang, K. Li, X. Zhang, G. Li, T. Liu, X. Wu, S.L. Brown, L. Zhou, Q.S. Mi, MicroRNA-155 Controls iNKT Cell Development and Lineage Differentiation by Coordinating Multiple Regulating Pathways, *Front. Cell Dev. Biol.* 8 (2021) 1–18. <https://doi.org/10.3389/fcell.2020.619220>.

- [83] M.G. Katze, Y. He, M. Gale, Viruses and interferon: a fight for supremacy, *Nat. Rev. Immunol.* 2 (2002) 675–687. <https://doi.org/10.1038/nri888>.
- [84] N. Mitash, J.E. Donovan, A. Swiatecka-Urban, The Role of MicroRNA in the Airway Surface Liquid Homeostasis, *Int. J. Mol. Sci.* 21 (2020) 3848. <https://doi.org/10.3390/ijms21113848>.
- [85] D.T. Gracias, E. Stelekati, J.L. Hope, A.C. Boesteanu, T.A. Doering, J. Norton, Y.M. Mueller, J.A. Fraietta, E.J. Wherry, M. Turner, P.D. Katsikis, The microRNA miR-155 controls CD8+ T cell responses by regulating interferon signaling, *Nat. Immunol.* 14 (2013) 593–602. <https://doi.org/10.1038/ni.2576>.
- [23] K. Jiang, J. Yang, S. Guo, G. Zhao, H. Wu, G. Deng, Peripheral Circulating Exosome-Mediated Delivery of miR-155 as a Novel Mechanism for Acute Lung Inflammation, *Mol. Ther.* 27 (2019) 1758–1771. <https://doi.org/10.1016/j.ymthe.2019.07.003>.
- [86] A. Centa, A.S. Fonseca, S.G. da Silva Ferreira, M.L. V. Azevedo, C.B. V. de Paula, S. Nagashima, C. Machado-Souza, A.F.R. dos Santos Miggiolaro, C. Pellegrino Baena, L. de Noronha, L.R. Cavalli, Deregulated miRNA expression is associated with endothelial dysfunction in post-mortem lung biopsies of COVID-19 patients, *Am. J. Physiol. Cell. Mol. Physiol.* 320 (2021) L405–L412. <https://doi.org/10.1152/ajplung.00457.2020>.
- [87] R. Bartoszewski, M. Dabrowski, B. Jakiela, S. Matalon, K.S. Harrod, M. Sanak, J.F. Collawn, SARS-CoV-2 may regulate cellular responses through depletion of specific host miRNAs, *Am. J. Physiol. Cell. Mol. Physiol.* 319 (2020) L444–L455. <https://doi.org/10.1152/ajplung.00252.2020>.
- [88] B.S. Comer, B. Camoretti-Mercado, P.C. Kogut, A.J. Halayko, J. Solway, W.T. Gerthoffer, MicroRNA-146a and microRNA-146b expression and anti-inflammatory function in human airway smooth muscle, *Am. J. Physiol. Cell. Mol. Physiol.* 307 (2014) L727–L734. <https://doi.org/10.1152/ajplung.00174.2014>.
- [8] D. de Gonzalo-Calvo, I.D. Benítez, L. Pinilla, A. Carratalá, A. Moncusí-Moix, C. Gort-Paniello, M. Molinero, J. González, G. Torres, M. Bernal, S. Pico, R. Almansa, N. Jorge, A. Ortega, E. Bustamante-Munguira, J.M. Gómez, M. González-Rivera, D. Micheloud, P. Ryan, A. Martínez, L. Tamayo, C. Aldecoa, R. Ferrer, A. Ceccato, L. Fernández-Barat, A. Motos, J. Riera, R. Menéndez, D. García-Gasulla, O. Peñuelas, A. Torres, J.F. Bermejo-Martín, F. Barbé, Circulating microRNA profiles predict the severity of COVID-19 in hospitalized patients, *Transl. Res.* 236 (2021) 147–159. <https://doi.org/10.1016/j.trsl.2021.05.004>.
- [89] A. Anzola, R. González, R. Gámez-Belmonte, B. Ocón, C.J. Aranda, P. Martínez-Moya, R. López-Posadas, C. Hernández-Chirlaque, F. Sánchez de Medina, O. Martínez-Augustin, miR-146a regulates the crosstalk between intestinal epithelial cells, microbial components and inflammatory stimuli, *Sci. Rep.* 8 (2018) 1–12. <https://doi.org/10.1038/s41598-018-35338-y>.
- [60] J. Sabbatinelli, A. Giuliani, G. Matakchione, S. Latini, N. Laprovitera, G. Pomponio, A. Ferrarini, S. Svegliati Baroni, M. Pavani, M. Moretti, A. Gabrielli, A.D. Procopio, M. Ferracin, M. Bonafè, F. Olivieri, Decreased serum levels of the inflammaging marker miR-146a are associated with clinical non-response to tocilizumab in COVID-19 patients, *Mech. Ageing Dev.* 193 (2021) 111413. <https://doi.org/10.1016/j.mad.2020.111413>.
- [70] Ana B. Arroyo, María P. Fernández-Pérez, Alberto del Monte, Sonia Águila, Raúl Méndez, Rebecca Hernández-Antolín, Nuria García-Barber, Ascensión M de los Reyes-García, Paula González-Jiménez, María I. Arcas, Vicente Vicente, Rosario Menéndez, Vicente Andrés,

Rocío González-Conejero, Constantino Martínez, miR-146a is a pivotal regulator of neutrophil extracellular trap formation promoting thrombosis, *Haematologica*. 106 (2020) 1636–1646. <https://doi.org/10.3324/haematol.2019.240226>.

- [13] K.D. Taganov, M.P. Boldin, K.-J. Chang, D. Baltimore, NF- $\kappa$ B-dependent induction of microRNA miR-146, an inhibitor targeted to signaling proteins of innate immune responses, *Proc. Natl. Acad. Sci.* 103 (2006) 12481–12486. <https://doi.org/10.1073/pnas.0605298103>.
- [71] R. Saba, D.L. Sorensen, S.A. Booth, MicroRNA-146a: A Dominant, Negative Regulator of the Innate Immune Response, *Front. Immunol.* 5 (2014) 1–11. <https://doi.org/10.3389/fimmu.2014.00578>.
- [72] M.P. Boldin, K.D. Taganov, D.S. Rao, L. Yang, J.L. Zhao, M. Kalwani, Y. Garcia-Flores, M. Luong, A. Devrekanli, J. Xu, G. Sun, J. Tay, P.S. Linsley, D. Baltimore, miR-146a is a significant brake on autoimmunity, myeloproliferation, and cancer in mice, *J. Exp. Med.* 208 (2011) 1189–1201. <https://doi.org/10.1084/jem.20101823>.
- [90] S. Bátkai, T. Thum, MicroRNAs in Hypertension: Mechanisms and Therapeutic Targets, *Curr. Hypertens. Rep.* 14 (2012) 79–87. <https://doi.org/10.1007/s11906-011-0235-6>.
- [56] M. Ackermann, S.E. Verleden, M. Kuehnel, A. Haverich, T. Welte, F. Laenger, A. Vanstapel, C. Werlein, H. Stark, A. Tzankov, W.W. Li, V.W. Li, S.J. Mentzer, D. Jonigk, Pulmonary Vascular Endothelialitis, Thrombosis, and Angiogenesis in Covid-19, *N. Engl. J. Med.* 383 (2020) 120–128. <https://doi.org/10.1056/NEJMoa2015432>.
- [58] P. Pineau, S. Volinia, K. McJunkin, A. Marchio, C. Battiston, B. Terris, V. Mazzaferro, S.W. Lowe, C.M. Croce, A. Dejean, miR-221 overexpression contributes to liver tumorigenesis, *Proc. Natl. Acad. Sci.* 107 (2010) 264–269. <https://doi.org/10.1073/pnas.0907904107>.
- [59] W.-X. Chen, Q. Hu, M.-T. Qiu, S.-L. Zhong, J.-J. Xu, J.-H. Tang, J.-H. Zhao, miR-221/222: promising biomarkers for breast cancer, *Tumor Biol.* 34 (2013) 1361–1370. <https://doi.org/10.1007/s13277-013-0750-y>.
