# Supplementary material for: miR-146a, miR-221, and miR-155 are Involved in Inflammatory Immune Response in Severe COVID-19 Patients
Source: MDPI journal article supplement (doi:10.3390/diagnostics13010133), 2022-12-30
Supplement: s1 [file s1]

Supplementary Table 1. miRNAs selection criteria

| miRNAs   | Justification for validation                                                                                                                                                                                                                                                                        | Reference                             |
|----------|-----------------------------------------------------------------------------------------------------------------------------------------------------------------------------------------------------------------------------------------------------------------------------------------------------|---------------------------------------|
| miR-16   | Involved in regulation of inflammation and programmed cell death, acute lung injury, sepsis, phenotypic changes on T cells survival, differentiation, and proliferation.<br><br>Targeting genes responsible for host-SARS-CoV-2 interaction. Influence viral entry receptor (ACE2) related networks | [19,35,44,57,77–80]<br><br>[57,80,81] |
| miR-155  | Involved in inflammation. T cell differentiation and innate immunity.<br><br>Regulates pathways related with IFN superfamily, NF-kB and MAP Kinase pathways. Cardiac, lung and kidney damage.                                                                                                       | [11,43–45,82]<br><br>[23,83–85]       |
| miR-34a  | Thrombotic events and Ras signaling<br><br>Can bind to multiple sites on noncoding SARS-CoV-2 RNA, which can affect the host immune response                                                                                                                                                        | [19,86]<br><br>[87]                   |
| miR-146a | Regulation of cytokine-responsive gene expression, and the pro-inflammatory cytokines like IL-6, TNF- $\alpha$ , IL-1 and IL-8. Regulation of NF-kB, MAP kinase, and STAT 3 pathways. Thrombo-inflammatory processes. Cytokine storm.                                                               | [8,13,60,70–72,88,89]                 |
| miR-221  | Regulation of inflammation and vascular remodeling. Lung injury, coagulopathy, thrombosis.<br><br>Regulation of innate immune response and promoting viral infection.                                                                                                                               | [19,56,90]<br><br>[44,57–59]          |
